# Supplementary material for: Effect of Supplementation of Lambs with Whole Cottonseed: Impact on Serum Biomarkers and Infection by Gastrointestinal Parasites under Field Conditions
Source: MDPI journal article supplement (doi:10.3390/metabo13030398), 2023-03-08
Supplement: s1 [file s1]

## Supplementary Materials

**Table S1.** Formulation and chemical composition of the experimental trial diets.

| Diets                                 | Whole<br>Cottonseed | Control |
|---------------------------------------|---------------------|---------|
| <b>Ingredients (%)</b>                |                     |         |
| Corn ground                           | 17.66               | 35.07   |
| Soybean meal                          | 4.93                | 1.15    |
| Mineral <sup>1</sup>                  | 1.83                | 1.83    |
| Limestone                             | 0.80                | 0.86    |
| Urea                                  | -                   | 1.26    |
| Monensin <sup>2</sup>                 | 0.03                | 0.03    |
| Whole cottonseed                      | 14.91               | -       |
| Maize silage                          | 29.93               | 29.91   |
| Aruana guinea grass                   | 29.93               | 29.91   |
| <b>Chemical composition</b>           |                     |         |
| Dry matter (%)                        | 52.78               | 54.60   |
| Net Energy for Maintenance (Mcal/ kg) | 2.25                | 2.23    |
| Net Energy for Gain (Mcal/ kg)        | 0.87                | 0.87    |
| Crude Protein (%)                     | 14.21               | 14.88   |
| Metabolizable Protein (%)             | 8.50                | 8.40    |
| Ether Extract (%)                     | 3.96                | 3.08    |
| Neutral Detergent Fiber (%)           | 36.19               | 24.04   |
| Acid Detergent Fiber (%)              | 21.24               | 11.69   |
| Calcium (%)                           | 0.70                | 0.70    |
| Phosphorus (%)                        | 0.40                | 0.40    |

<sup>1</sup>Mineral composition (kg of product) 155 g Ca, 65 g P, 110 g Mg, 210 g S, 380 mg Se, 83.500 mg Zn, 26.300 mg Mn, 2500 mg I, 2500 mg Co; (Maximicrominer, Maxi Nutrição Animal).

<sup>2</sup>Rumensin (Elanco Animal Health, Greenfield).

**Table S2.** Mean ( $\pm$  standard deviation) of average daily weight gain values of crossbred lambs naturally infected with gastrointestinal nematodes and *Eimeria* spp., receiving two different diets (whole cottonseed and control) at seven different samplings (0 – 84 days). Between each sample collection there was an interval of 14 days.

|             |         | Time (days) |                           |                           |                            |                           |                            | Effects ( <i>p</i> -value) |       |          |
|-------------|---------|-------------|---------------------------|---------------------------|----------------------------|---------------------------|----------------------------|----------------------------|-------|----------|
|             |         | G           | 0 - 14                    | 14 - 28                   | 28 - 42                    | 42 - 56                   | 56 - 70                    | 70 - 84                    | G     | Days     |
| ADG (g/day) | WCS     |             | 102.38a<br>( $\pm$ 87.89) | 117.85a<br>( $\pm$ 72.27) | 117.46a<br>( $\pm$ 52.27)  | 82.14a<br>( $\pm$ 94.06)  | 142.06ab<br>( $\pm$ 87.54) | 200.00b<br>( $\pm$ 60.31)  | 0.391 | < 0.0001 |
|             | Control |             | 105.55a<br>( $\pm$ 56.32) | 107.14a<br>( $\pm$ 53.11) | 117.46a<br>( $\pm$ 106.96) | 131.34a<br>( $\pm$ 65.01) | 94.04a<br>( $\pm$ 70.72)   | 258.33b<br>( $\pm$ 57.26)  |       | 0.028    |

ADG = Average daily weight gain; G = Groups; WCS = Whole cottonseed. Means followed different lowercase letters in the row differ statistically at each time (days) by Tukey test ( $p < 0.05$ ).

**Table S3.** Mean ( $\pm$  standard deviation) concentrations of the biochemicals analytes of crossbred lambs naturally infected with gastrointestinal nematodes and *Eimeria* spp., receiving two different diets (whole cottonseed and control) at seven different samplings (0 – 84 days). Between each sample collection there was an interval of 14 days.

|                            |         | Time (days)              |                          |                          |                           |                           |                           |                          | Effects ( <i>p</i> -value) |       |          |
|----------------------------|---------|--------------------------|--------------------------|--------------------------|---------------------------|---------------------------|---------------------------|--------------------------|----------------------------|-------|----------|
| G                          |         | 0                        | 14                       | 28                       | 42                        | 56                        | 70                        | 84                       | G                          | Days  | G x Days |
| Albumin<br>(g/dL)          | WCS     | 2.64A<br>( $\pm$ 0.47)   | 2.66A<br>( $\pm$ 0.46)   | 2.74A<br>( $\pm$ 0.42)   | 2.57A<br>( $\pm$ 0.37)    | 2.54A<br>( $\pm$ 0.48)    | 2.70A<br>( $\pm$ 0.43)    | 2.77A<br>( $\pm$ 0.35)   | 0.005                      | 0.116 | 0.761    |
|                            | Control | 2.96B<br>( $\pm$ 0.41)   | 2.86B<br>( $\pm$ 0.33)   | 2.86A<br>( $\pm$ 0.29)   | 2.71B<br>( $\pm$ 0.30)    | 2.63A<br>( $\pm$ 0.35)    | 2.77A<br>( $\pm$ 0.33)    | 2.81A<br>( $\pm$ 0.28)   |                            |       |          |
| Total<br>Protein<br>(g/dL) | WCS     | 6.16ab<br>( $\pm$ 0.94)  | 5.91ab<br>( $\pm$ 0.64)  | 6.04ab<br>( $\pm$ 0.61)  | 5.92ab<br>( $\pm$ 0.58)   | 5.76a<br>( $\pm$ 0.85)    | 6.09ab<br>( $\pm$ 0.59)   | 6.27b<br>( $\pm$ 0.42)   | 0.785                      | 0.047 | 1.000    |
|                            | Control | 6.14ab<br>( $\pm$ 0.62)  | 5.96ab<br>( $\pm$ 0.44)  | 6.12ab<br>( $\pm$ 0.44)  | 5.95ab<br>( $\pm$ 0.59)   | 5.79a<br>( $\pm$ 0.71)    | 6.09ab<br>( $\pm$ 0.76)   | 6.24b<br>( $\pm$ 0.61)   |                            |       |          |
| Globulins<br>(g/dL)        | WCS     | 3.51<br>( $\pm$ 0.76)    | 3.26<br>( $\pm$ 0.42)    | 3.30<br>( $\pm$ 0.38)    | 3.34<br>( $\pm$ 0.42)     | 3.22<br>( $\pm$ 0.51)     | 3.39<br>( $\pm$ 0.39)     | 3.49<br>( $\pm$ 0.34)    | 0.059                      | 0.167 | 0.862    |
|                            | Control | 3.18<br>( $\pm$ 0.47)    | 3.10<br>( $\pm$ 0.47)    | 3.26<br>( $\pm$ 0.43)    | 3.24<br>( $\pm$ 0.46)     | 3.17<br>( $\pm$ 0.48)     | 3.33<br>( $\pm$ 0.54)     | 3.44<br>( $\pm$ 0.49)    |                            |       |          |
| Cholesterol<br>(g/dL)      | WCS     | 56.08a<br>( $\pm$ 12.45) | 54.67a<br>( $\pm$ 11.65) | 67.22b<br>( $\pm$ 15.97) | 63.90ab<br>( $\pm$ 12.52) | 61.88ab<br>( $\pm$ 11.94) | 61.81ab<br>( $\pm$ 17.48) | 71.79b<br>( $\pm$ 13.57) | 0.263                      | 0.002 | 0.518    |
|                            | Control | 57.26a<br>( $\pm$ 15.89) | 58.82a<br>( $\pm$ 10.86) | 64.80b<br>( $\pm$ 10.79) | 60.99ab<br>( $\pm$ 9.13)  | 57.99ab<br>( $\pm$ 13.51) | 61.40ab<br>( $\pm$ 11.57) | 63.07b<br>( $\pm$ 14.05) |                            |       |          |

G = Groups; WCS = Whole cottonseed. For each variable, means followed by different uppercase letters in the column differ statistically between groups and means followed by different lowercase letters in the row differ statistically at each time (days) by Tukey test ( $p < 0.05$ ).

**Table S4.** Mean ( $\pm$  standard deviation) concentrations of the biomarkers of oxidative stress of crossbred lambs naturally infected with gastrointestinal nematodes and *Eimeria* spp., receiving two different diets (whole cottonseed and control) at seven different samplings (0 – 84 days). Between each sample collection there was an interval of 14 days.

|                      |         | Time (days)                |                            |                            |                            |                            |                             |                            | Effects ( <i>p</i> -value) |          |          |
|----------------------|---------|----------------------------|----------------------------|----------------------------|----------------------------|----------------------------|-----------------------------|----------------------------|----------------------------|----------|----------|
| G                    |         | 0                          | 14                         | 28                         | 42                         | 56                         | 70                          | 84                         | G                          | Days     | G x Days |
| TEAC<br>(mmol/L)     | WCS     | 0.59A<br>( $\pm$ 0.07)     | 0.59A<br>( $\pm$ 0.06)     | 0.60A<br>( $\pm$ 0.07)     | 0.59A<br>( $\pm$ 0.04)     | 0.57A<br>( $\pm$ 0.09)     | 0.60A<br>( $\pm$ 0.06)      | 0.62A<br>( $\pm$ 0.04)     | 0.015                      | 0.148    | 0.974    |
|                      | Control | 0.58A<br>( $\pm$ 0.05)     | 0.59A<br>( $\pm$ 0.03)     | 0.58B<br>( $\pm$ 0.04)     | 0.57B<br>( $\pm$ 0.04)     | 0.55B<br>( $\pm$ 0.06)     | 0.57B<br>( $\pm$ 0.06)      | 0.59B<br>( $\pm$ 0.06)     |                            |          |          |
| FRAP<br>(mmol/L)     | WCS     | 0.43<br>( $\pm$ 0.116)     | 0.44<br>( $\pm$ 0.104)     | 0.47<br>( $\pm$ 0.162)     | 0.44<br>( $\pm$ 0.092)     | 0.47<br>( $\pm$ 0.104)     | 0.46<br>( $\pm$ 0.089)      | 0.50<br>( $\pm$ 0.110)     | 0.191                      | 0.119    | 0.953    |
|                      | Control | 0.44<br>( $\pm$ 0.104)     | 0.47<br>( $\pm$ 0.089)     | 0.48<br>( $\pm$ 0.080)     | 0.49<br>( $\pm$ 0.067)     | 0.46<br>( $\pm$ 0.091)     | 0.46<br>( $\pm$ 0.066)      | 0.52<br>( $\pm$ 0.124)     |                            |          |          |
| CUPRAC<br>(mmol/L)   | WCS     | 0.48<br>( $\pm$ 0.069)     | 0.49<br>( $\pm$ 0.077)     | 0.51<br>( $\pm$ 0.082)     | 0.49<br>( $\pm$ 0.052)     | 0.48<br>( $\pm$ 0.072)     | 0.52<br>( $\pm$ 0.075)      | 0.52<br>( $\pm$ 0.049)     | 0.778                      | 0.290    | 0.507    |
|                      | Control | 0.53<br>( $\pm$ 0.050)     | 0.51<br>( $\pm$ 0.043)     | 0.50<br>( $\pm$ 0.053)     | 0.49<br>( $\pm$ 0.038)     | 0.489<br>( $\pm$ 0.063)    | 0.49<br>( $\pm$ 0.045)      | 0.52<br>( $\pm$ 0.056)     |                            |          |          |
| Thiol ( $\mu$ mol/L) | WCS     | 201.54Aa<br>( $\pm$ 54.16) | 199.78Aa<br>( $\pm$ 48.07) | 220.11Aa<br>( $\pm$ 55.07) | 200.37Aa<br>( $\pm$ 38.54) | 202.32Aa<br>( $\pm$ 46.72) | 231.40Aab<br>( $\pm$ 48.10) | 247.39Ab<br>( $\pm$ 41.79) | 0.0009                     | < 0.0001 | 0.714    |
|                      | Control | 237.31Ba<br>( $\pm$ 37.79) | 225.86Ba<br>( $\pm$ 35.63) | 219.05Aa<br>( $\pm$ 32.63) | 214.11Aa<br>( $\pm$ 31.96) | 218.83Aa<br>( $\pm$ 38.13) | 247.33Aab<br>( $\pm$ 40.28) | 269.13Bb<br>( $\pm$ 50.82) |                            |          |          |

|                      |         |                       |                       |                        |                       |                        |                       |                       |       |        |       |
|----------------------|---------|-----------------------|-----------------------|------------------------|-----------------------|------------------------|-----------------------|-----------------------|-------|--------|-------|
| Uric acid<br>(mg/dL) | WCS     | 0.17<br>(± 0.038)     | 0.18<br>(± 0.055)     | 0.17<br>(± 0.039)      | 0.19<br>(± 0.054)     | 0.19<br>(± 0.066)      | 0.17<br>(± 0.037)     | 0.16<br>(± 0.054)     | 0.175 | 0.439  | 0.430 |
|                      | Control | 0.17<br>(± 0.039)     | 0.16<br>(± 0.028)     | 0.18<br>(± 0.046)      | 0.19<br>(± 0.028)     | 0.19<br>(± 0.037)      | 0.19<br>(± 0.066)     | 0.17<br>(± 0.030)     |       |        |       |
| PON-1<br>(IU/L)      | WCS     | 13.11a<br>(± 3.56)    | 16.72b<br>(± 2.83)    | 17.65b<br>(± 2.96)     | 18.06b<br>(± 3.10)    | 17.58ab<br>(± 4.01)    | 14.99ab<br>(± 7.48)   | 15.65ab<br>(± 6.17)   | 0.382 | 0.006  | 0.561 |
|                      | Control | 13.28a<br>(± 4.38)    | 17.29b<br>(± 3.93)    | 16.28b<br>(± 5.26)     | 16.01b<br>(± 5.16)    | 15.10ab<br>(± 4.93)    | 15.86ab<br>(± 5.54)   | 16.31ab<br>(± 3.58)   |       |        |       |
| AOPP<br>(µmol/L)     | WCS     | 172.69Ab<br>(± 60.56) | 155.25Ab<br>(± 47.44) | 189.61Ab<br>(± 109.42) | 170.53Ab<br>(± 32.96) | 156.13Aab<br>(± 37.44) | 123.92Aa<br>(± 28.23) | 157.86Ab<br>(± 27.05) | 0.011 | 0.0002 | 0.584 |
|                      | Control | 139.74Bb<br>(± 35.13) | 158.02Ab<br>(± 37.01) | 154.82Bb<br>(± 38.00)  | 165.72Ab<br>(± 37.74) | 126.91Bab<br>(± 33.74) | 109.17Ba<br>(± 29.06) | 153.36Ab<br>(± 93.35) |       |        |       |
| TOS (µmol/L)         | WCS     | 13.88ab<br>(± 6.79)   | 12.86a<br>(± 5.60)    | 20.26b<br>(± 19.98)    | 11.37a<br>(± 3.47)    | 14.41ab<br>(± 5.67)    | 11.99a<br>(± 3.51)    | 15.58b<br>(± 4.80)    | 0.253 | 0.031  | 0.293 |
|                      | Control | 16.59ab<br>(± 5.27)   | 15.14a<br>(± 5.33)    | 15.38b<br>(± 5.36)     | 14.47a<br>(± 5.13)    | 13.93ab<br>(± 5.68)    | 13.18a<br>(± 3.99)    | 20.22b<br>(± 16.94)   |       |        |       |
| FOX (µmol/L)         | WCS     | 51.96A<br>(± 10.35)   | 52.70A<br>(± 6.82)    | 57.27A<br>(± 23.18)    | 52.07A<br>(± 5.35)    | 52.55A<br>(± 9.12)     | 49.32A<br>(± 7.22)    | 56.16A<br>(± 5.56)    | 0.040 | 0.078  | 0.850 |
|                      | Control | 52.37A<br>(± 8.09)    | 56.20B<br>(± 10.23)   | 57.36A<br>(± 9.71)     | 57.79B<br>(± 7.87)    | 53.14A<br>(± 7.67)     | 54.45B<br>(± 6.60)    | 60.68B<br>(± 19.14)   |       |        |       |

|                                |         |                       |                        |                        |                      |                      |                      |                         |        |          |       |
|--------------------------------|---------|-----------------------|------------------------|------------------------|----------------------|----------------------|----------------------|-------------------------|--------|----------|-------|
| <b>d-ROMs<br/>(Carr units)</b> | WCS     | 122.36Ab<br>(± 31.02) | 103.79Aac<br>(± 22.88) | 113.88Aab<br>(± 22.81) | 93.09Ac<br>(± 19.91) | 89.23Ac<br>(± 18.56) | 87.06Ac<br>(± 20.93) | 101.49Aabc<br>(± 24.83) |        |          |       |
|                                | Control | 107.06Bb<br>(± 26.85) | 88.80Bac<br>(± 20.55)  | 94.63Bab<br>(± 17.28)  | 82.89Bc<br>(± 21.59) | 83.18Bc<br>(± 20.93) | 86.45Ac<br>(± 21.53) | 99.21Aabc<br>(± 27.59)  | 0.0008 | < 0.0001 | 0.525 |

G = Groups; WCS = Whole cottonseed; TEAC = Trolox equivalent antioxidant capacity; FRAP = Ferric reducing ability of plasma; CUPRAC = Cupric reducing antioxidant capacity; PON-1 = Paraoxonase-1; AOPP = Advanced oxidation protein products; TOS = Total oxidant status; FOX = Ferric-xylenol orange; d-ROMs = Reactive oxygen metabolites derived compounds means followed by different uppercase letters in the column differ statistically between groups and means followed by different lowercase letters in the row differ statistically at each time (days) by Tukey test ( $p < 0.05$ ).
